# Supplementary material for: Believing in Change Matters! The Role of Emotion Malleability Beliefs in Emotion Regulation and Paranoid Ideation
Source: Springer Nature journal article supplement (doi:10.1007/s10608-023-10443-z), 2023-11-02
Supplement: MOESM1 [file 26253866]

**Appendix.**

**Table A1**

*Pearson correlations of beliefs that emotions are malleable, emotion regulation strategies, and paranoid ideation in the clinical sample (n = 50)*

|  | Malleability Beliefs | Reappraisal | Acceptance | Rumination | Expressive Suppression | Experience Suppression | PSYRATS Sum Score |
| --- | --- | --- | --- | --- | --- | --- | --- |
| Malleability Beliefs | 1 |  |  |  |  |  |  |
| Reappraisal | 0.31* | 1 |  |  |  |  |  |
| Acceptance | 0.30* | 0.41* | 1 |  |  |  |  |
| Rumination | -0.15 | -0.07 | -0.24 | 1 |  |  |  |
| Expressive Suppression | 0.11 | 0.02 | 0.16 | -0.04 | 1 |  |  |
| Experience Suppression | 0.01 | -0.16 | 0.05 | -0.07 | 0.31* | 1 |  |
| PSYRATS Sum Score | 0.20 | -0.27 | -0.12 | 0.03 | -0.14 | 0.08 | 1 |
| *Note.* PSYRATS = The Psychotic Symptom Rating Scales, subscale delusion (sum score). * *p* < .05. | | | | | | | |

**Table A2**

*Pearson correlations of beliefs that emotions are malleable, emotion regulation strategies, and paranoid ideation in the community sample (n=218)*

|  | Malleability Beliefs | Reappraisal | Acceptance | Rumination | Expressive Suppression | Experience Suppression | Frequency of paranoid ideation |
| --- | --- | --- | --- | --- | --- | --- | --- |
| Malleability Beliefs | 1 |  |  |  |  |  |  |
| Reappraisal | 0.34* | 1 |  |  |  |  |  |
| Acceptance | 0.33* | 0.60* | 1 |  |  |  |  |
| Rumination | -0.18* | -0.23* | -0.26* | 1 |  |  |  |
| Expressive Suppression | -0.01 | -0.10 | -0.07 | 0.19* | 1 |  |  |
| Experience Suppression | 0.05 | 0.04 | 0.08 | -0.07 | 0.54* | 1 |  |
| Frequency of paranoid ideation | -0.20* | -0.45* | -0.39* | 0.32* | 0.22* | 0.13 | 1 |
| *Note.* Paranoid ideation was measured by the Paranoia Checklist (Frequency). * *p* < .05. | | | | | | | |

**Table A3**

*Current paranoid delusion as a moderator of the association of malleability beliefs with emotion regulation strategies and paranoid ideation*

| Malleability Beliefs | Δ*R2* | *F* | *p* | 95% CI |
| --- | --- | --- | --- | --- |
| - Reappraisal | 0.01 | *F*(1, 46) = 0.31 | .581 | [-0.45, 0.79] |
| - Acceptance | 0.01 | *F*(1, 46) = 0.26 | .614 | [-0.76, 0.45] |
| - Rumination | 0.02 | *F*(1, 46) = 1.00 | .323 | [-0.88, 0.30] |
| - Expressive Suppression | 0.01 | *F*(1, 46) = 0.48 | .490 | [-0.75, 0.37] |
| - Experience Suppression | 0.00 | *F*(1, 46) = 0.02 | .899 | [-0.57, 0.50] |
| - PSYRATS Sum Score | 0.00 | *F*(1, 46) = 0.61 | .440 | [-3.58, 1.58] |
| *Note.* CI = confidence interval. PSYRATS = The Psychotic Symptom Rating Scales, subscale delusion (sum score). | | | | |
